# Supplementary material for: LAP degradation product reflects plasma kallikrein-dependent TGF-β activation in patients with hepatic fibrosis
Source: PubMed Central journal article supplement (PMC4033717; doi:10.1186/2193-1801-3-221), 2014-05-01
Supplement: 40064_2013_959_MOESM1_ESM.pdf [file 40064_2013_959_MOESM1_ESM.pdf]

## Supplemental Data

### **Figure S1 Sequence alignment of three pro-TGF- $\beta$ isoforms**

Sequences of TGF- $\beta$ s 1-3 are aligned (Roberts and Sporn 1990). Signal peptide portion is highlighted in light yellow. LAP portion is highlighted in light blue. Active TGF- $\beta$  portion is highlighted in magenta. Asterisks indicate same amino acids among three isoforms. PLK cleavage site (R<sup>58</sup>-L<sup>59</sup>) is indicated by a red arrow. Synthetic peptides, having the sequences from I<sup>36</sup> to S<sup>64</sup> (TGF- $\beta$ 1), L<sup>27</sup> to E<sup>55</sup> (TGF- $\beta$ 2), L<sup>30</sup> to E<sup>58</sup> (TGF- $\beta$ 3) surrounded by a rectangle, were made for checking isoform-specificity of R58 antibody.

## Supplemental Reference

Roberts AB, Sporn MB. (1990) The Transforming Growth Factor- $\beta$ s, in Peptide Growth Factors and Their Receptors I. Sporn MB, Roberts AB (eds) Springer-Verlag. Berlin, Germany. 419-472.

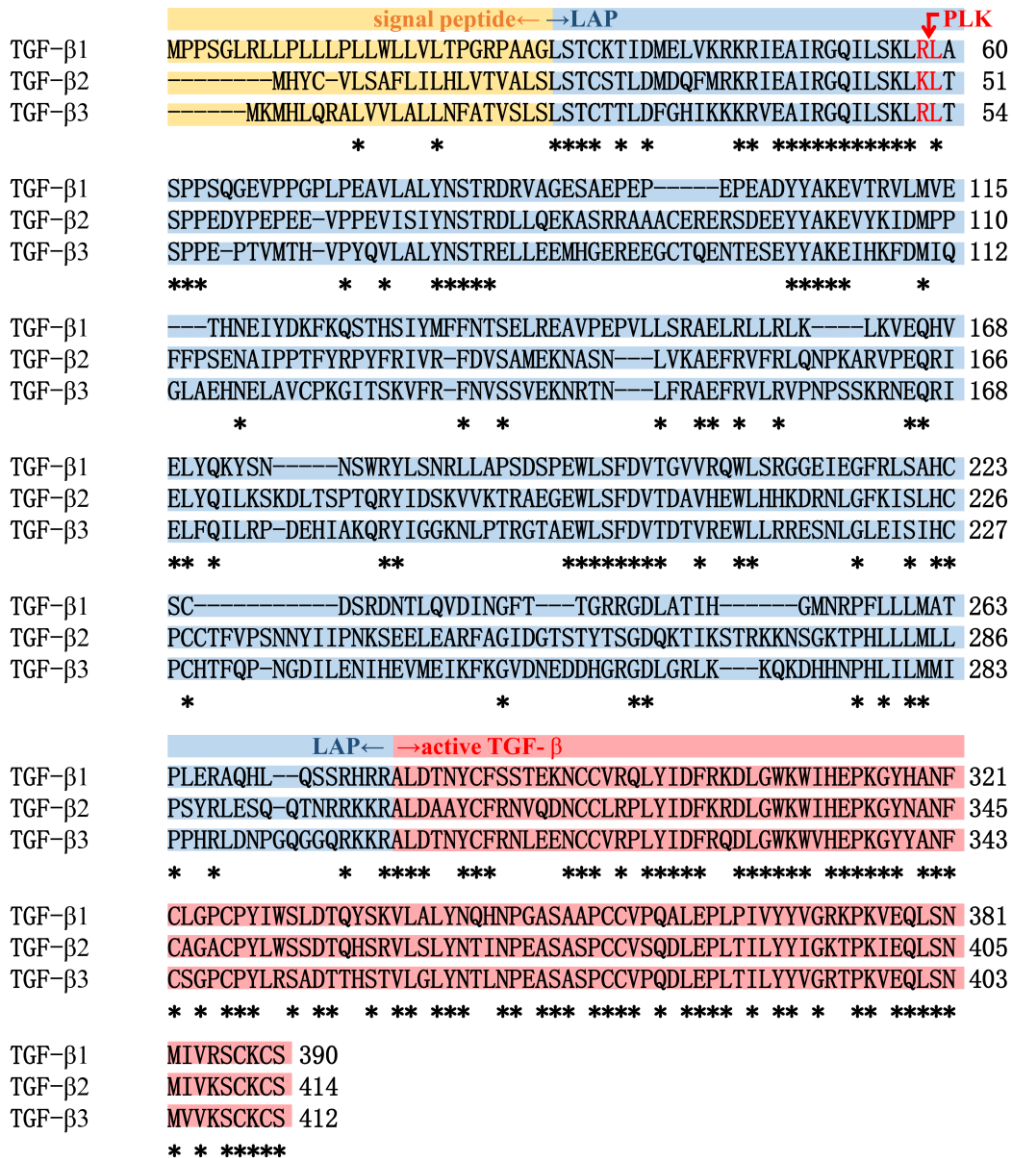

Figure S1
