# Supplementary material for: LAP degradation product reflects plasma kallikrein-dependent TGF-β activation in patients with hepatic fibrosis
Source: PubMed Central journal article supplement (PMC4033717; doi:10.1186/2193-1801-3-221), 2014-05-01
Supplement: 40064_2013_959_MOESM2_ESM.pdf [file 40064_2013_959_MOESM2_ESM.pdf]

## Supplemental Data

**Figure S2 Isoform specificity of R58 antibody**

Synthetic peptides derived from the indicated sequences of TGF- $\beta$ 1-3 LAP (refer to Figure S1) were incubated with/without PLK or PLN for 45 min at 37°C, and thereafter samples were spotted onto a nitrocellulose membrane followed by dot blot analyses using R58 antibody. *Lanes 1*, TGF- $\beta$ 1 LAP peptide; *lanes 2*, TGF- $\beta$ 2 LAP peptide; *lanes 3*, TGF- $\beta$ 3 LAP peptide. *Column 1*, undigested peptides; *column 2*, PLK-digested peptides; *column 3*, PLN-digested peptides. Representative results from three independent experiments with a similar result are shown.

|                | LAP peptide                                                                         | PLK-digested LAP peptide                                                            | PLN-digested LAP peptide                                                             |
|----------------|-------------------------------------------------------------------------------------|-------------------------------------------------------------------------------------|--------------------------------------------------------------------------------------|
| TGF- $\beta$ 1 |  |  |  |
| TGF- $\beta$ 2 |  |  |  |
| TGF- $\beta$ 3 |  |  |  |

**Figure S2**
